# Supplementary material for: Benchmarking Procedures for High-Throughput Context Specific Reconstruction Algorithms
Source: PubMed Central journal article supplement (PMC4722106; doi:10.3389/fphys.2015.00410), 2016-01-22
Supplement: SupplementaryFile1.pdf [file SupplementaryFile1.pdf]

# Supplementary Material: Benchmarking procedures for high-throughput context specific reconstruction algorithms

Maria Pires Pacheco <sup>1</sup>, Thomas Pfau <sup>1,2</sup> and Thomas Sauter <sup>1,\*</sup>

\*Correspondence:  
Thomas Sauter  
thomas.sauter@uni.lu

## 1 SUPPLEMENTARY TABLES AND FIGURES

**Table 1.** Number, percentage of gene-associated reactions and percentage of reactions of each context-specific reconstruction that have a high, medium and low confidence score to be expressed at the protein level. An enrichment in high and medium confidence level is observed for discretization-based algorithms (GIMME, iMAT, FASTCORE z-score, FASTCORMICS and FASTCORMICS medium constrained).

| algorithms                        | description                        | high | medium | low | not detected |
|-----------------------------------|------------------------------------|------|--------|-----|--------------|
| Recon                             | number of reactions                | 628  | 641    | 65  | 265          |
|                                   | % of the reactions of the model    | 11 % | 11 %   | 1 % | 5 %          |
|                                   | % of the gene-associated reactions | 17 % | 17 %   | 2 % | 7 %          |
| HepatoNet                         | number of reactions                | 213  | 266    | 47  | 108          |
|                                   | % of the reactions of the model    | 9 %  | 11 %   | 2 % | 5 %          |
|                                   | % of the gene-associated reactions | 12 % | 15 %   | 3 % | 6 %          |
| GIMME                             | number of reactions                | 518  | 444    | 47  | 126          |
|                                   | % of the reactions of the model    | 15 % | 13 %   | 1 % | 4 %          |
|                                   | % of the gene-associated reactions | 25 % | 21 %   | 2 % | 6 %          |
| iMAT                              | number of reactions                | 574  | 525    | 55  | 153          |
|                                   | % of the reactions of the model    | 16 % | 14 %   | 2 % | 4 %          |
|                                   | % of the gene-associated reactions | 24 % | 22 %   | 2 % | 6 %          |
| iNIT                              | number of reactions                | 453  | 499    | 55  | 155          |
|                                   | % of the reactions of the model    | 12 % | 13 %   | 1 % | 4 %          |
|                                   | % of the gene-associated reactions | 16 % | 18 %   | 2 % | 6 %          |
| RegrEX                            | number of reactions                | 376  | 418    | 41  | 186          |
|                                   | % of the reactions of the model    | 12 % | 13 %   | 1 % | 6 %          |
|                                   | % of the gene-associated reactions | 15 % | 16 %   | 2 % | 7 %          |
| Akesson08                         | number of reactions                | 624  | 637    | 64  | 260          |
|                                   | % of the reactions of the model    | 11 % | 11 %   | 1 % | 5 %          |
|                                   | % of the gene-associated reactions | 17 % | 17 %   | 2 % | 7 %          |
| FASTCORE z-score                  | number of reactions                | 584  | 413    | 21  | 123          |
|                                   | % of the reactions of the model    | 20 % | 14 %   | 1 % | 4 %          |
|                                   | % of the gene-associated reactions | 28 % | 20 %   | 1 % | 6 %          |
| FASTCORMICS                       | number of reactions                | 570  | 391    | 15  | 73           |
|                                   | % of the reactions of the model    | 21 % | 15 %   | 1 % | 3 %          |
|                                   | % of the gene-associated reactions | 30 % | 21 %   | 1 % | 4 %          |
| FASTCORMICS<br>medium constrained | number of reactions                | 481  | 343    | 15  | 66           |
|                                   | % of the reactions of the model    | 22 % | 16 %   | 1 % | 3 %          |
|                                   | % of the gene-associated reactions | 29 % | 21 %   | 1 % | 4 %          |

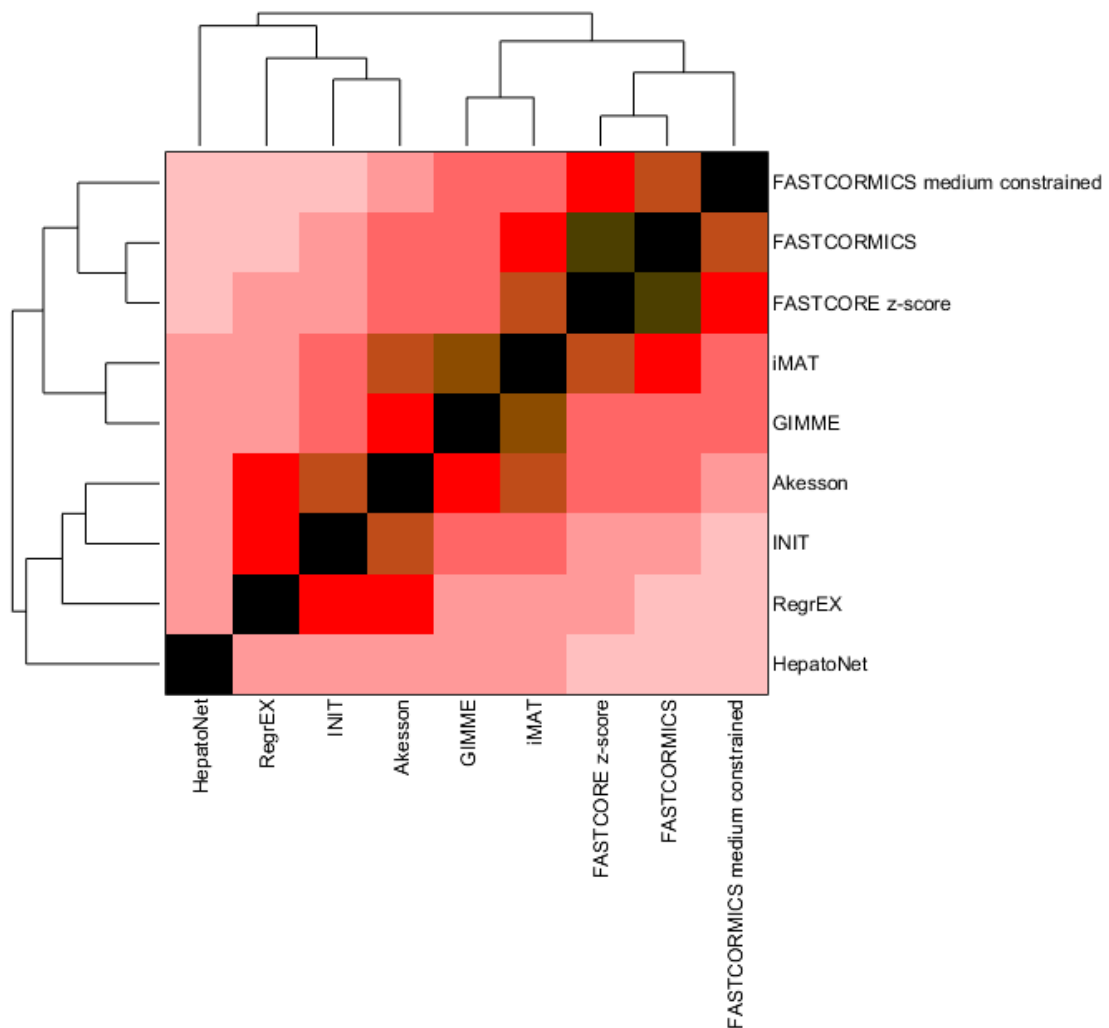

**Figure 1.** Similarity index of the models built by the different algorithms. The Jaccard index was computed for each pair of models, the rows and column were then clustered in function of the Euclidean distance. Contrary to what was expected, the output models of the tested algorithms, despite having been fed with the same input show a huge variability. The descritization-based algorithms (GIMME, iMAT, Akesson, FASTCORE, FASTCORMICS and FASTCORMICS no medium constrained) show the highest similarity levels.

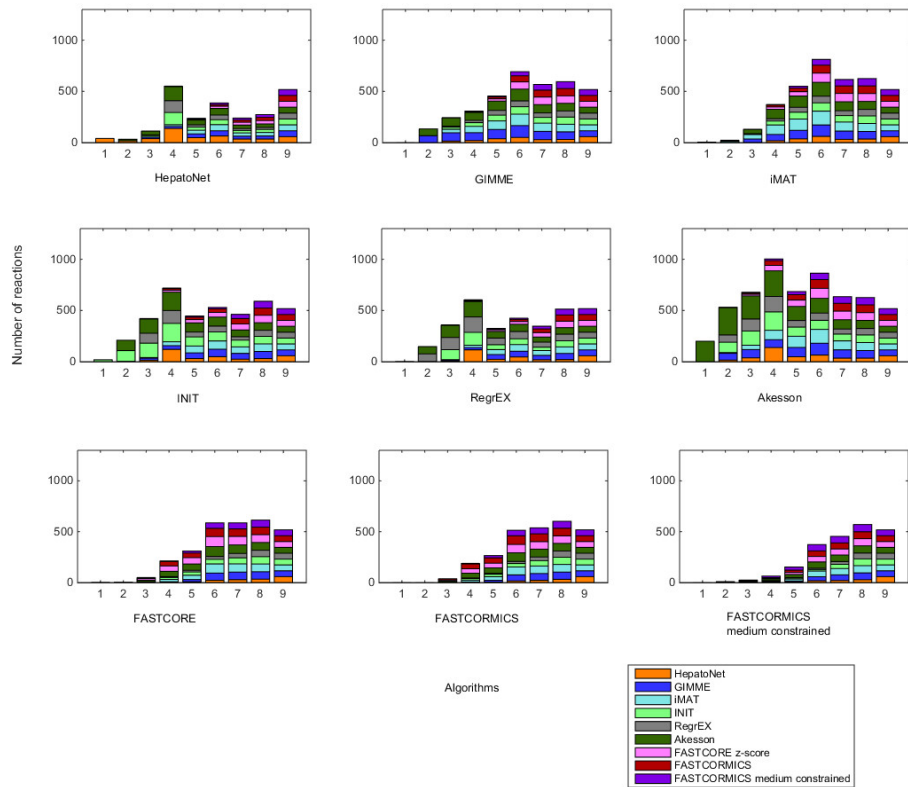

**Figure 2.** Reactions overlap: Each subplot represents HepatoNet or a model built by one of the tested algorithm. From left to right, in the top: HepatoNet, GIMME, iMAT, in the second row: INIT, ReGrEX, Akesson in the third row: FASTCORE z-score, and FASTCORMICS no medium constraint. The different bars of the stacked boxplot illustrate the number of reactions that are common to 1, 2, 3, 4, 5 to all the models. The colour in the stacked plots represent the reactions of different models (HepatoNet (orange), the GIMME (dark blue), iMAT (light blue), INIT (green), ReGrEX (gray), Akesson (dark green), FASTCORE z-score (pink), FASTCORMICS (brown) and FASTCORMICS no medium constrained (violet). The size of the colors areas are proportional to the number of reactions shared between the methods. A greater percentage of reactions in the GIMME, IMAT, FASTCORE, FASTCORMICS and FASTCORMICS medium constrained models are supported by at least 3 other algorithms.

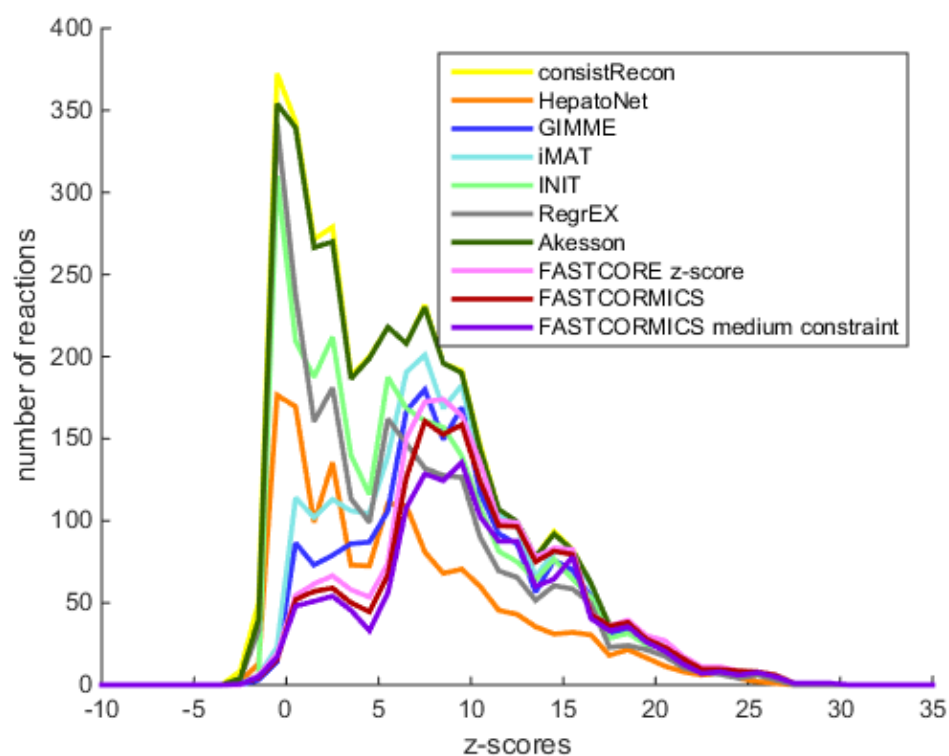

**Figure 3.** Confidence score at the transcriptomic level: Median z-score of the intensity measured in the liver samples to the median intensity distribution for the genes in an unexpressed context mapped the genes-associated reactions of Recon2 (yellow), HepatoNet (orange), the GIMME (dark blue), iMAT (light blue), INIT (green), RegrEx (gray), Akesson (dark green), FASTCORE z-score (pink), FASTCORMICS (brown) and FASTCORMICS no medium constrained (violet). Discretization-based algorithms (GIMME, iMAT, FASTCORE, FASTCORMICS and FASTCORMICS medium constrained) are enriched for higher z-score values.

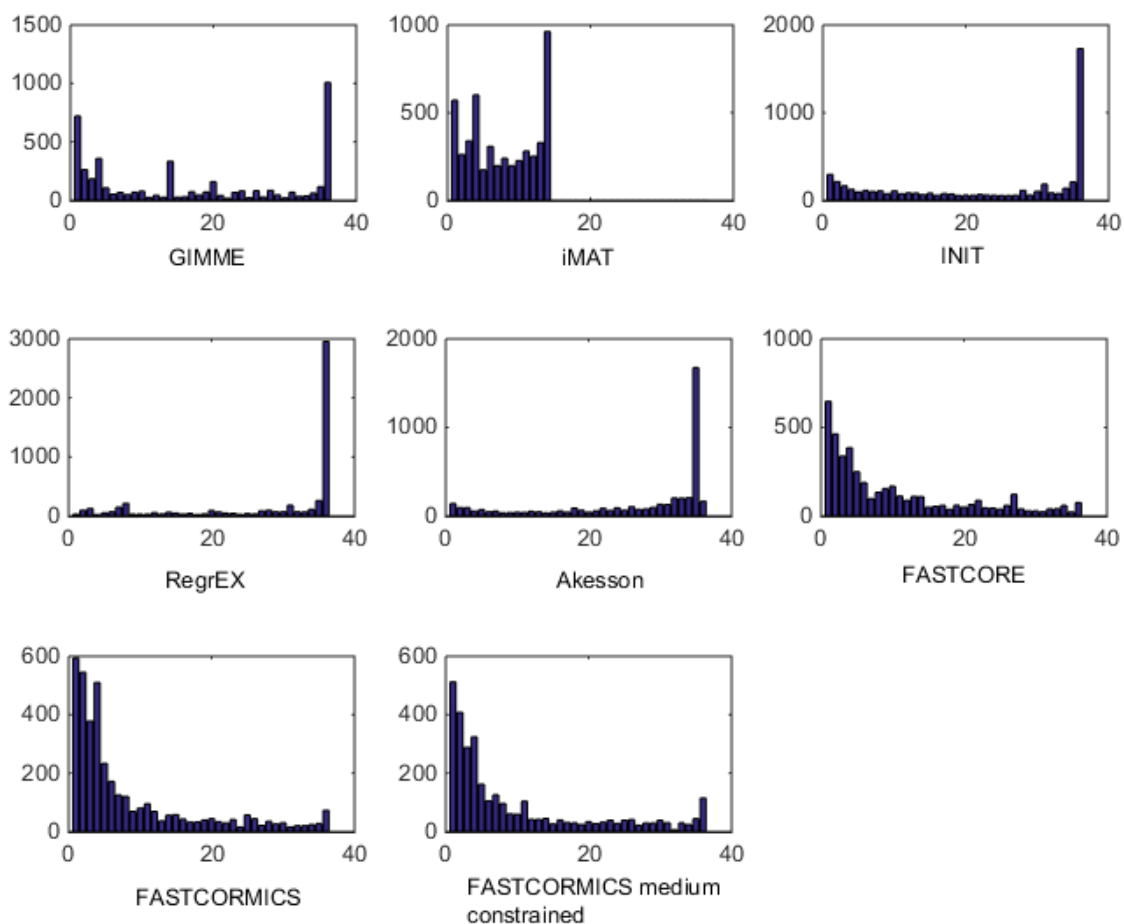

**Figure 4.** Tissue specificity of reconstructed models. Number of reactions that are present in 1, 2, 3 up to 36 tissues models. For INIT and RegrEX, more than 1500 and 3000 reactions are present in all tissues models, while a similar number is present in all but one model created by the Akesson method. Due to computational complexity iMAT was only able to generate 14 out of 36 tissue models.

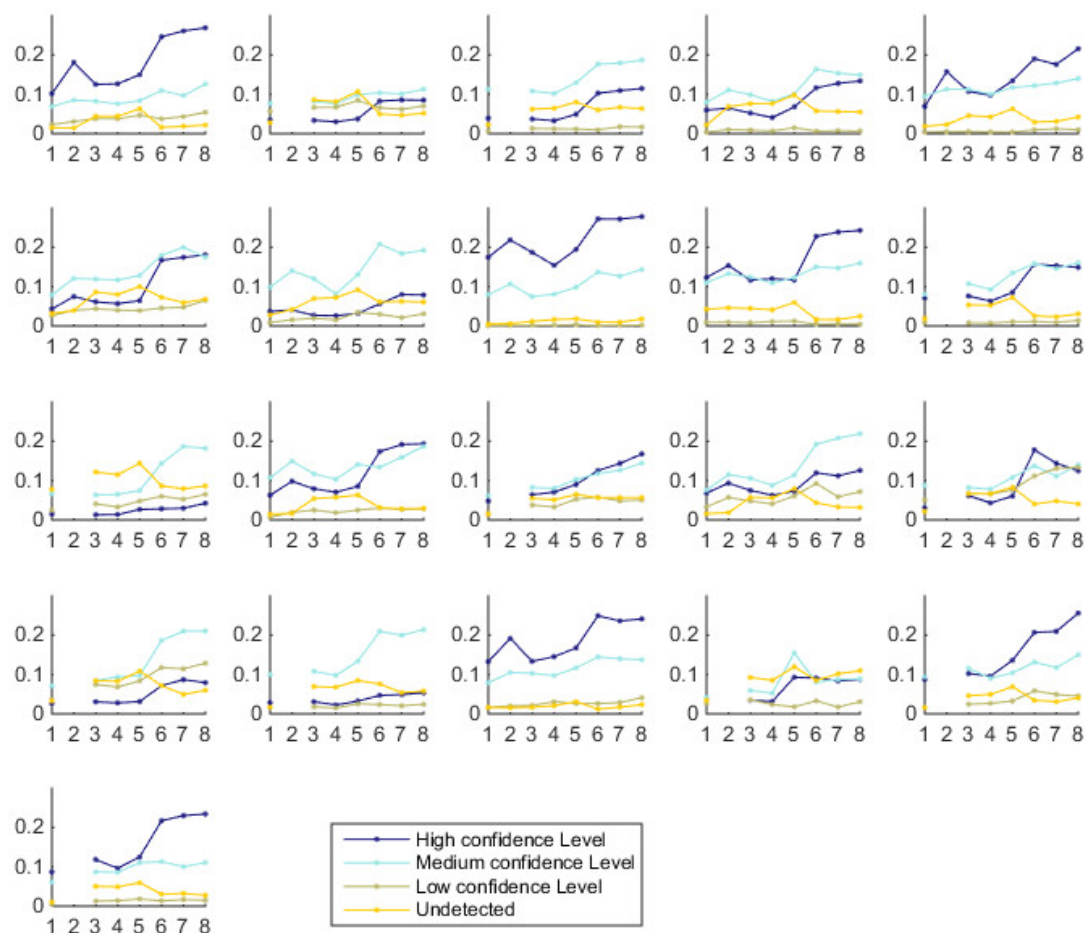

**Figure 5.** Percentage of reactions that are associated with high confidence (dark blue), medium confidence level (light blue), low confidence level (khaki) and not detected (yellow). Each subplot represent a different tissue. The x-axis represent the different algorithms: 1-GIMME, 2-iMAT, 3-INIT, 4-RegrEX, 5-Akesson, 6-FASTCORE z-score, 7-FASTCORMICS and 8-FASTCORMICS medium constrained and the y-axis the percentage of reactions.

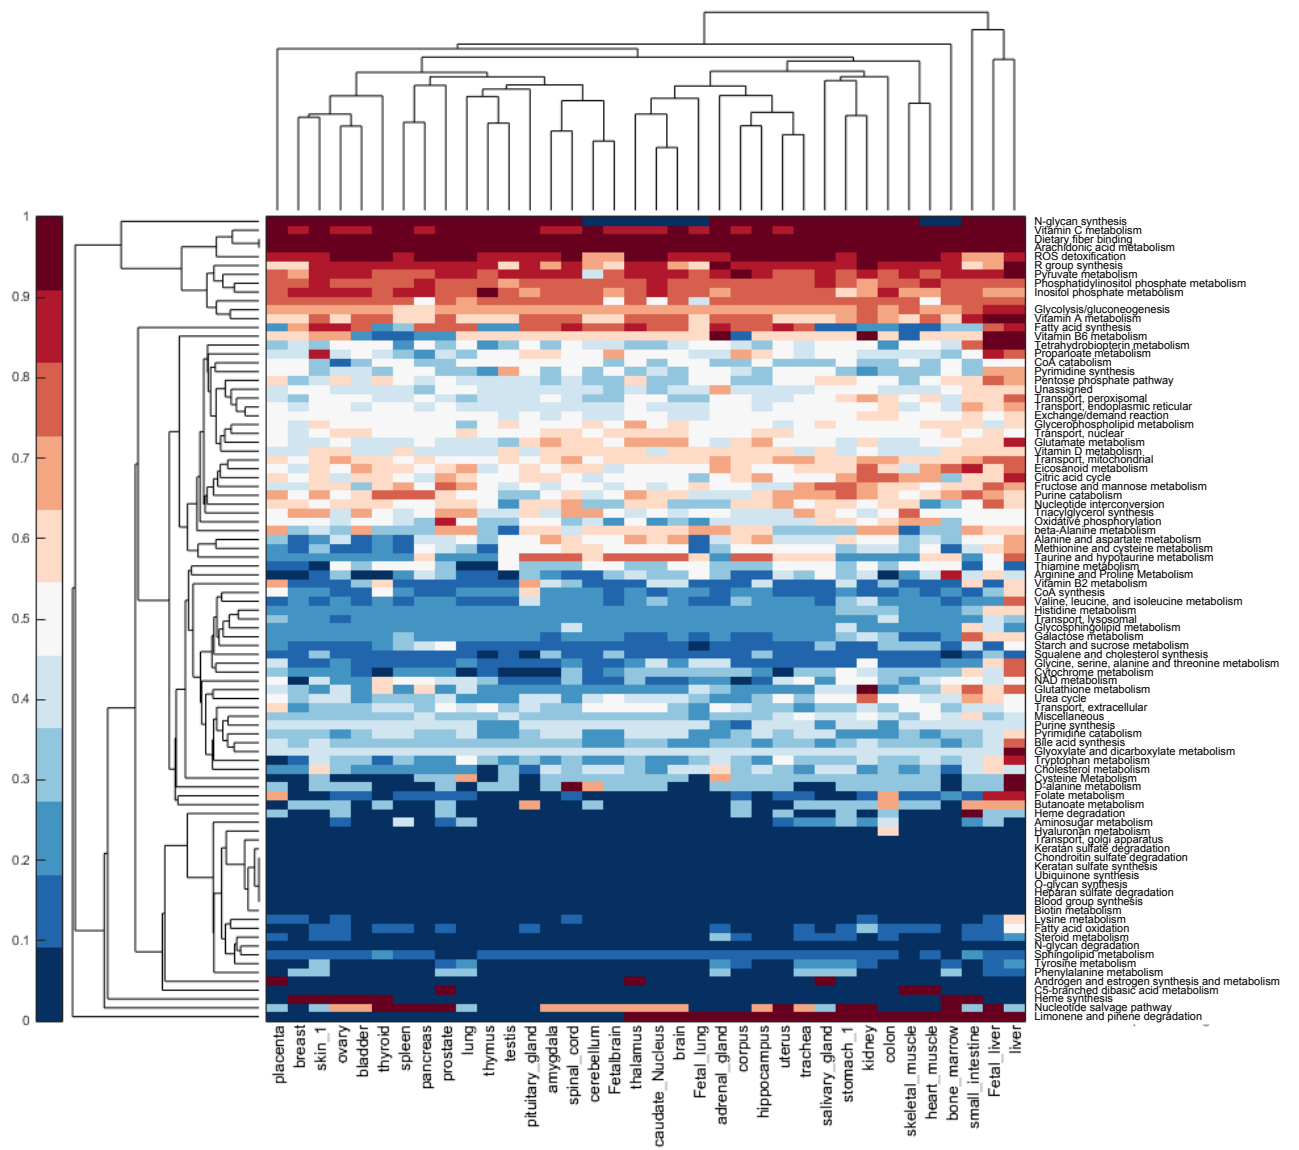

GIMME

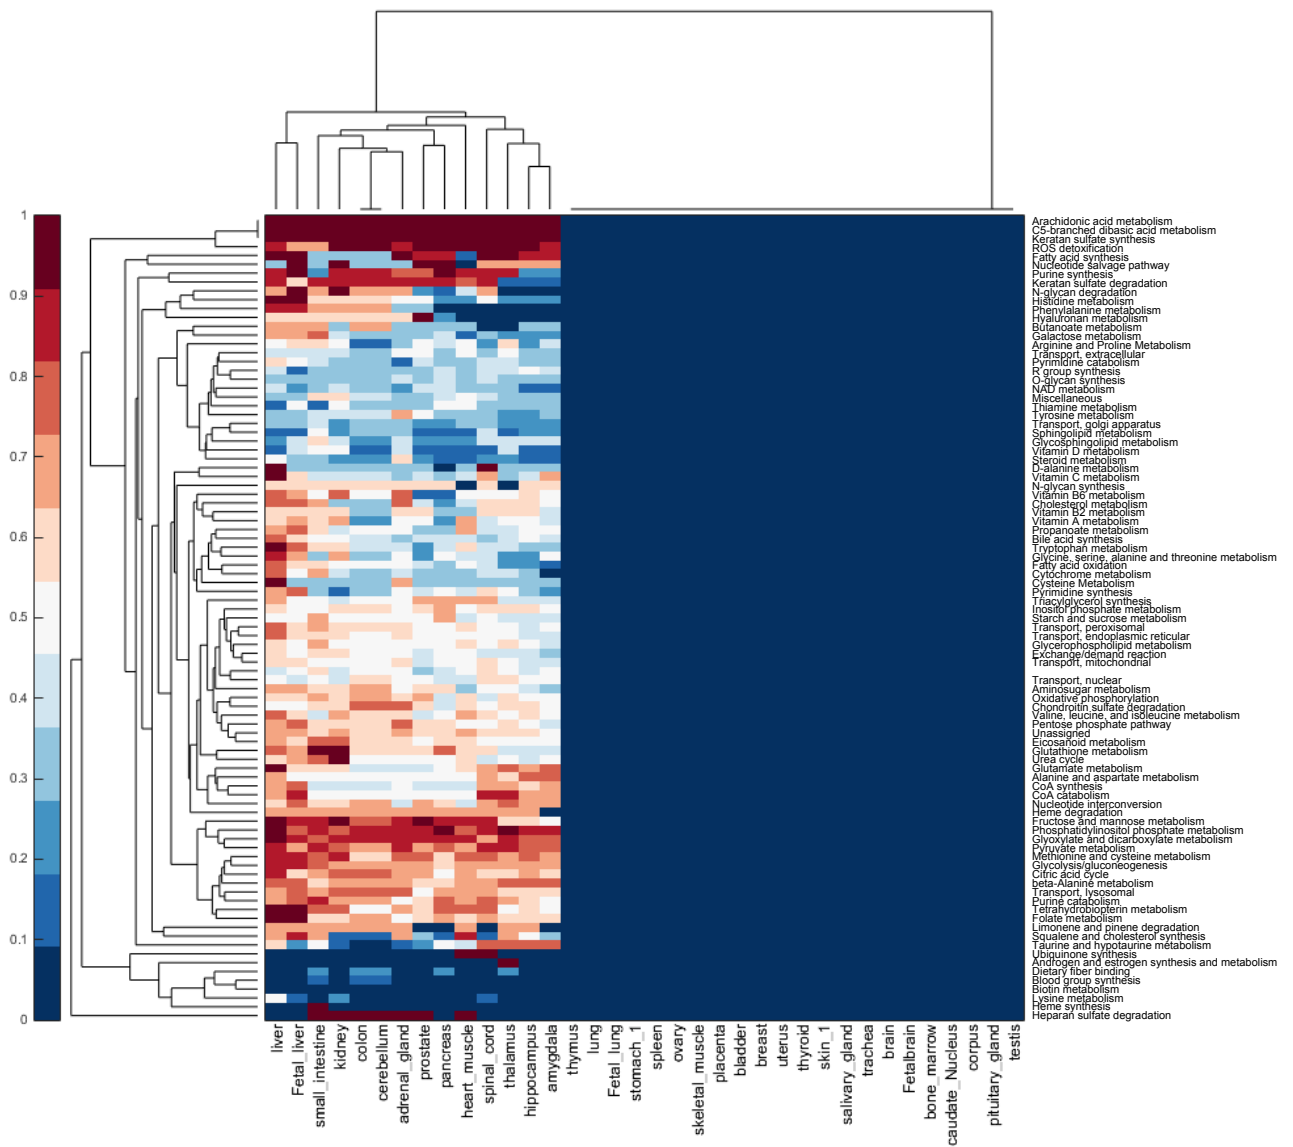

iMAT



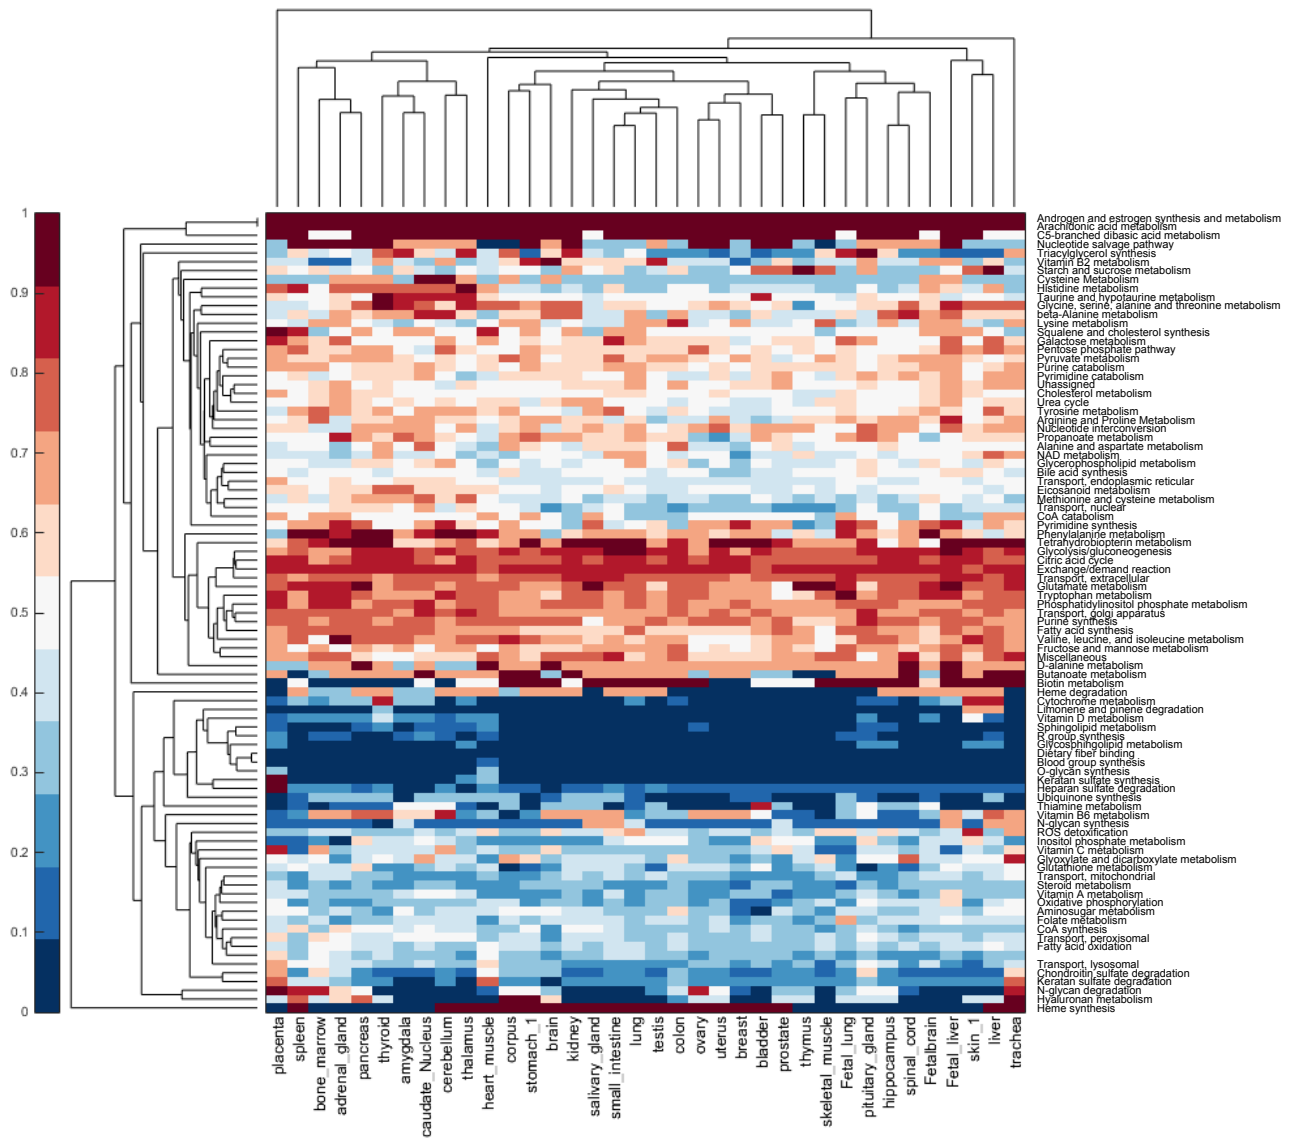

INIT

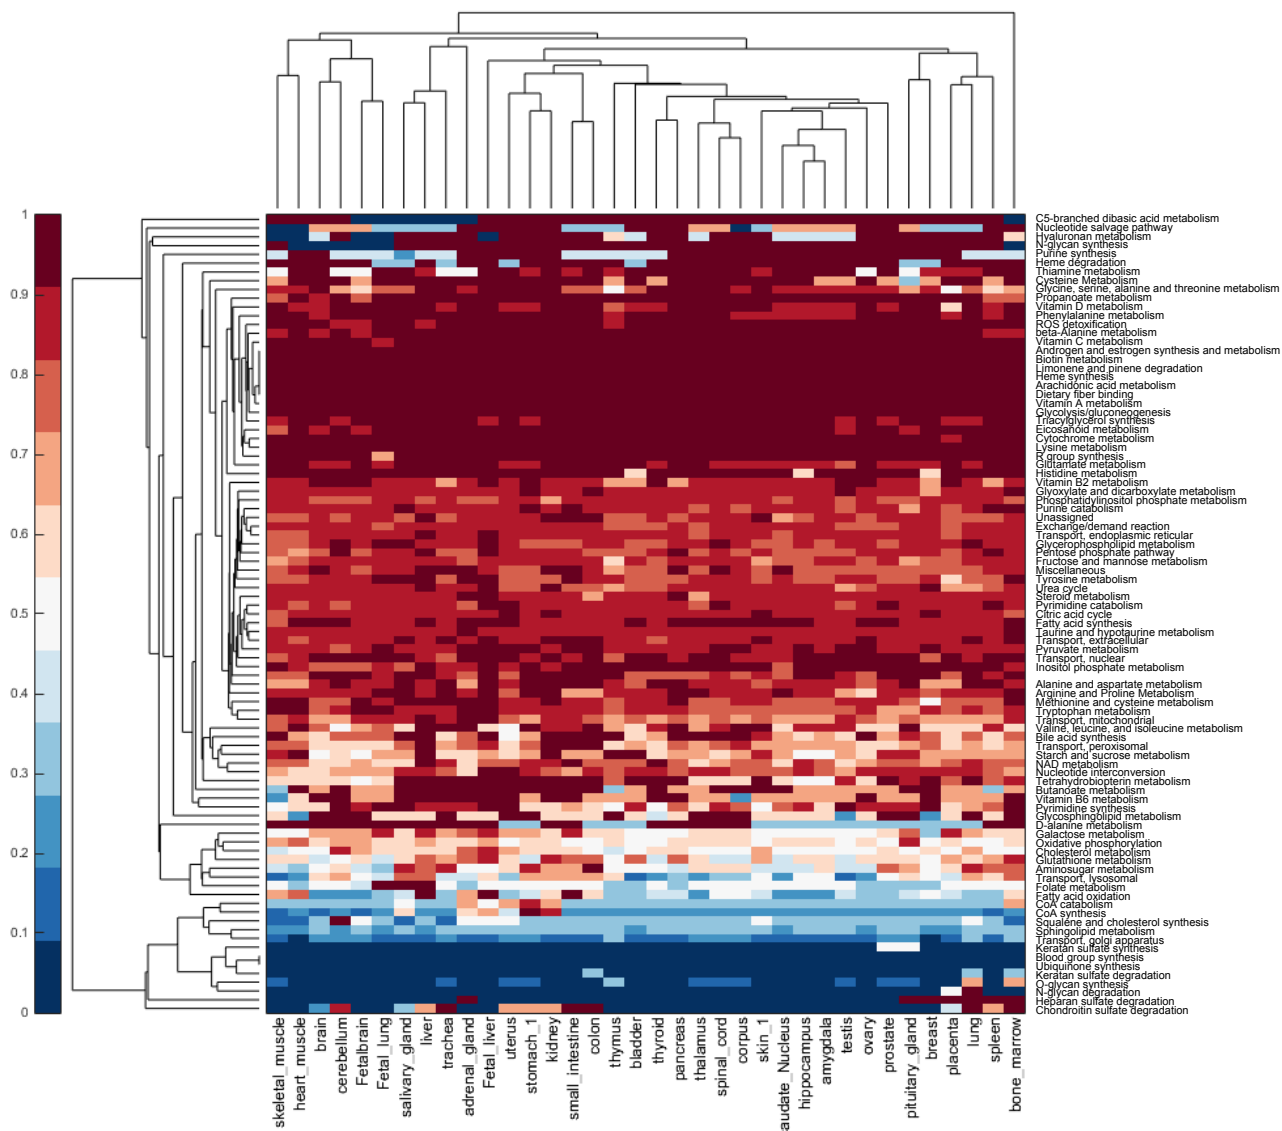

Akesson

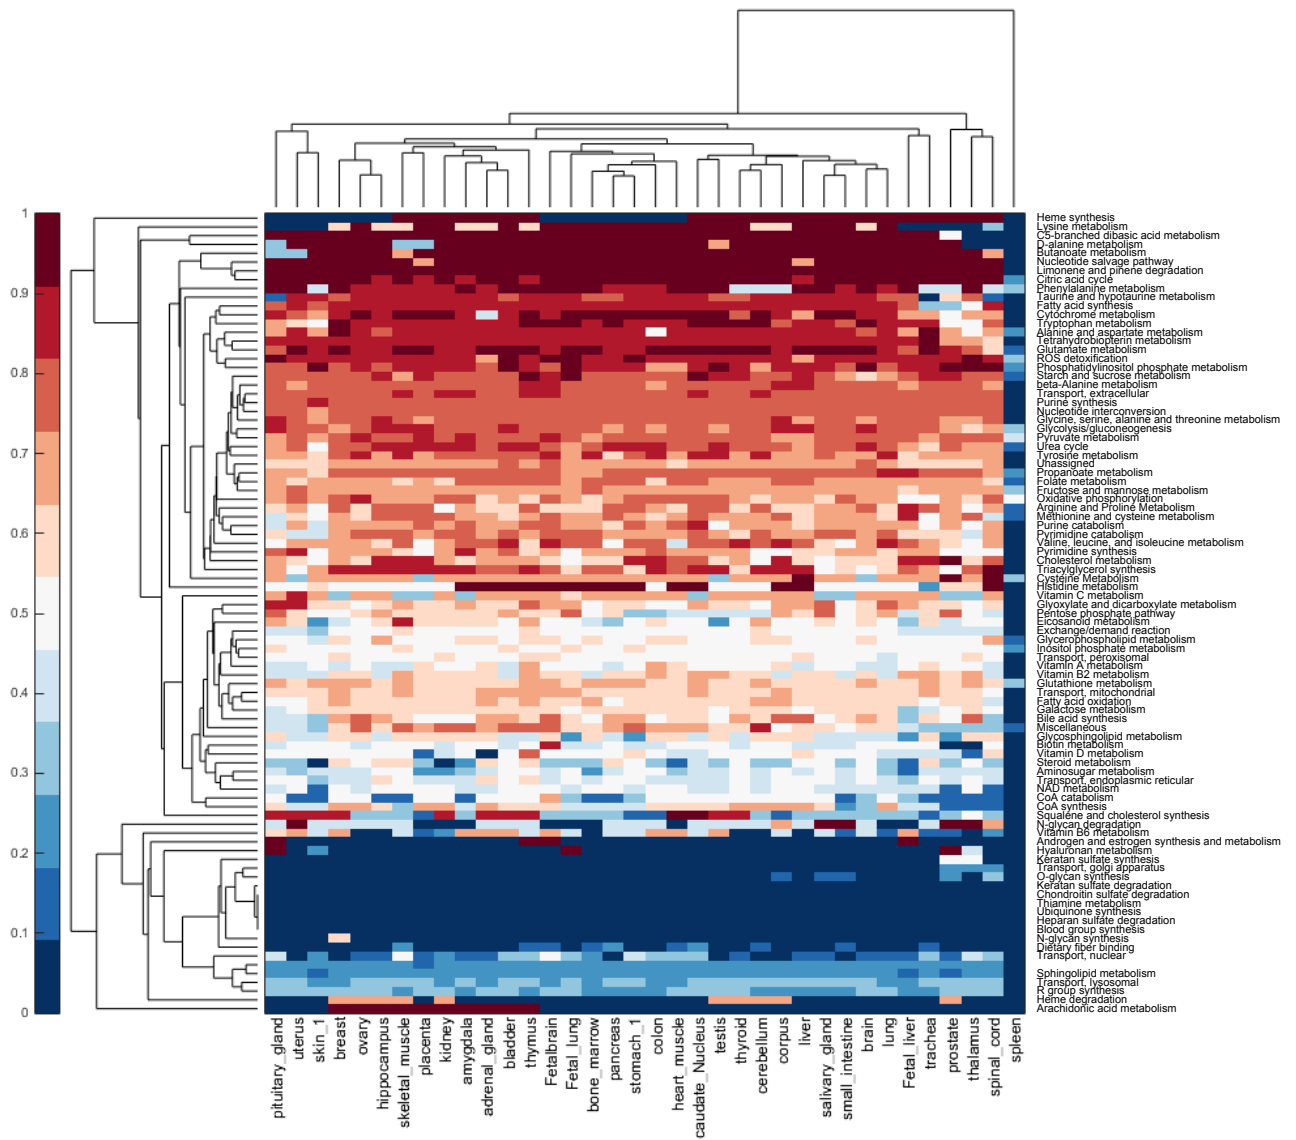

RegREX

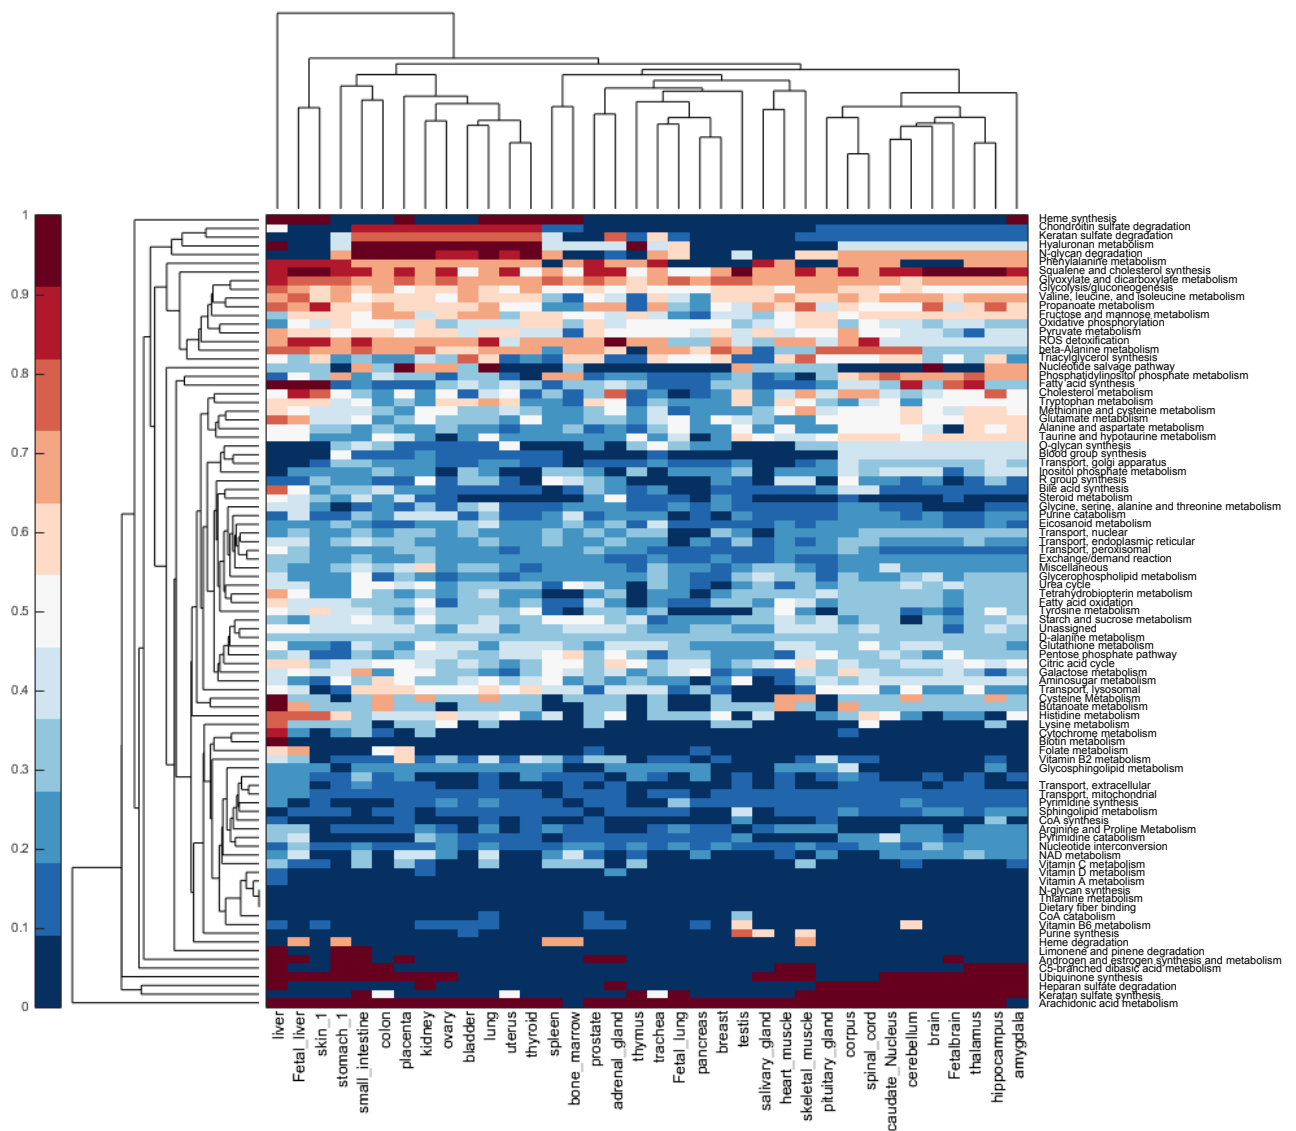

FASTCORE

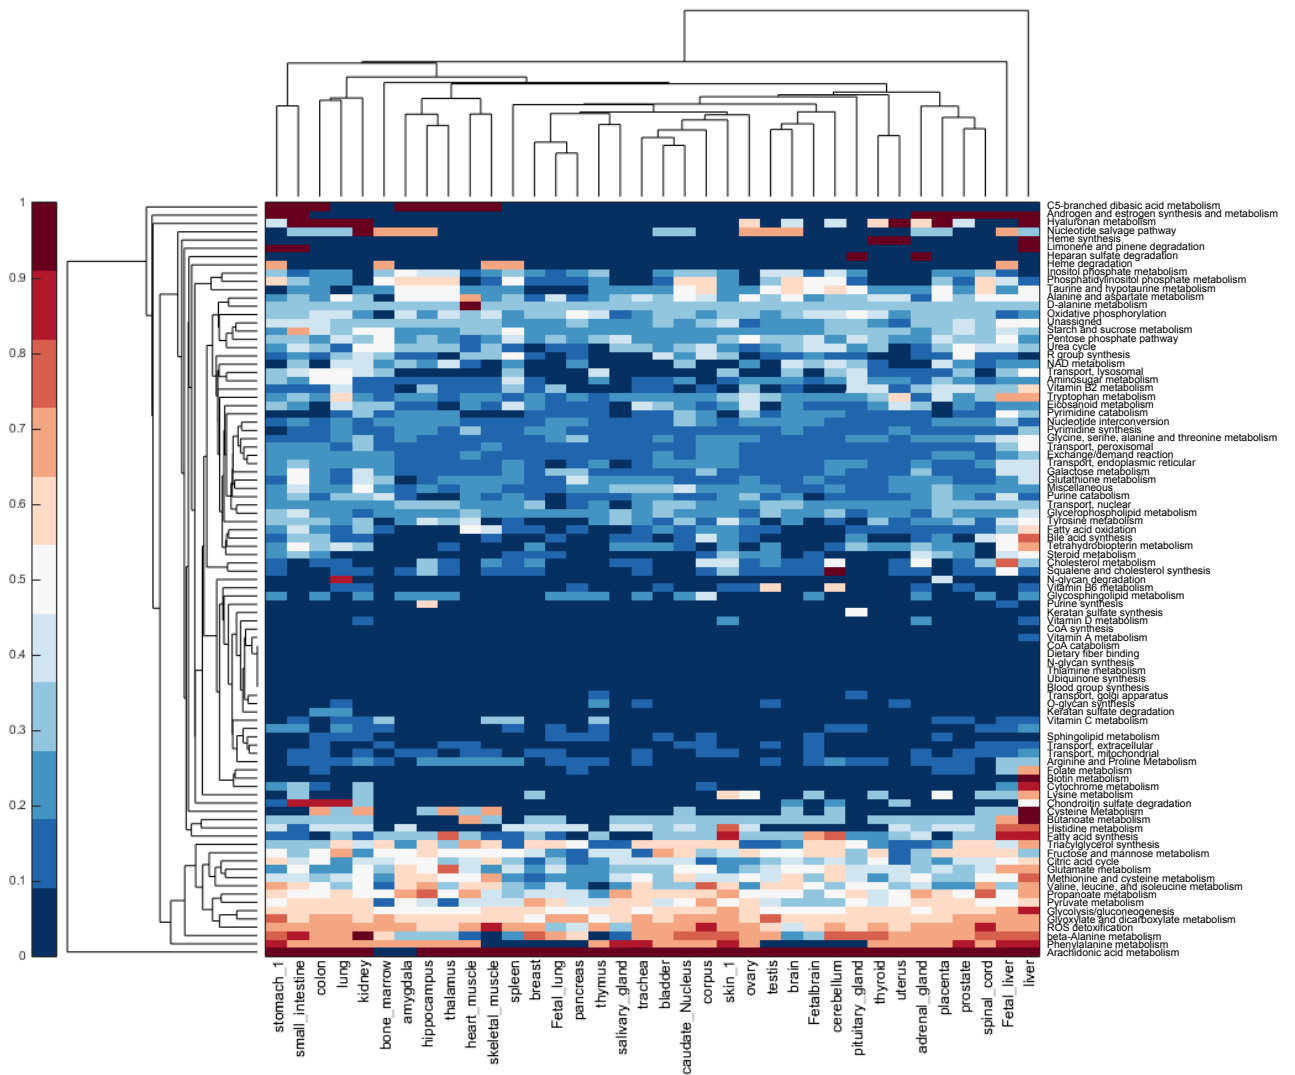

FASTCORMICS

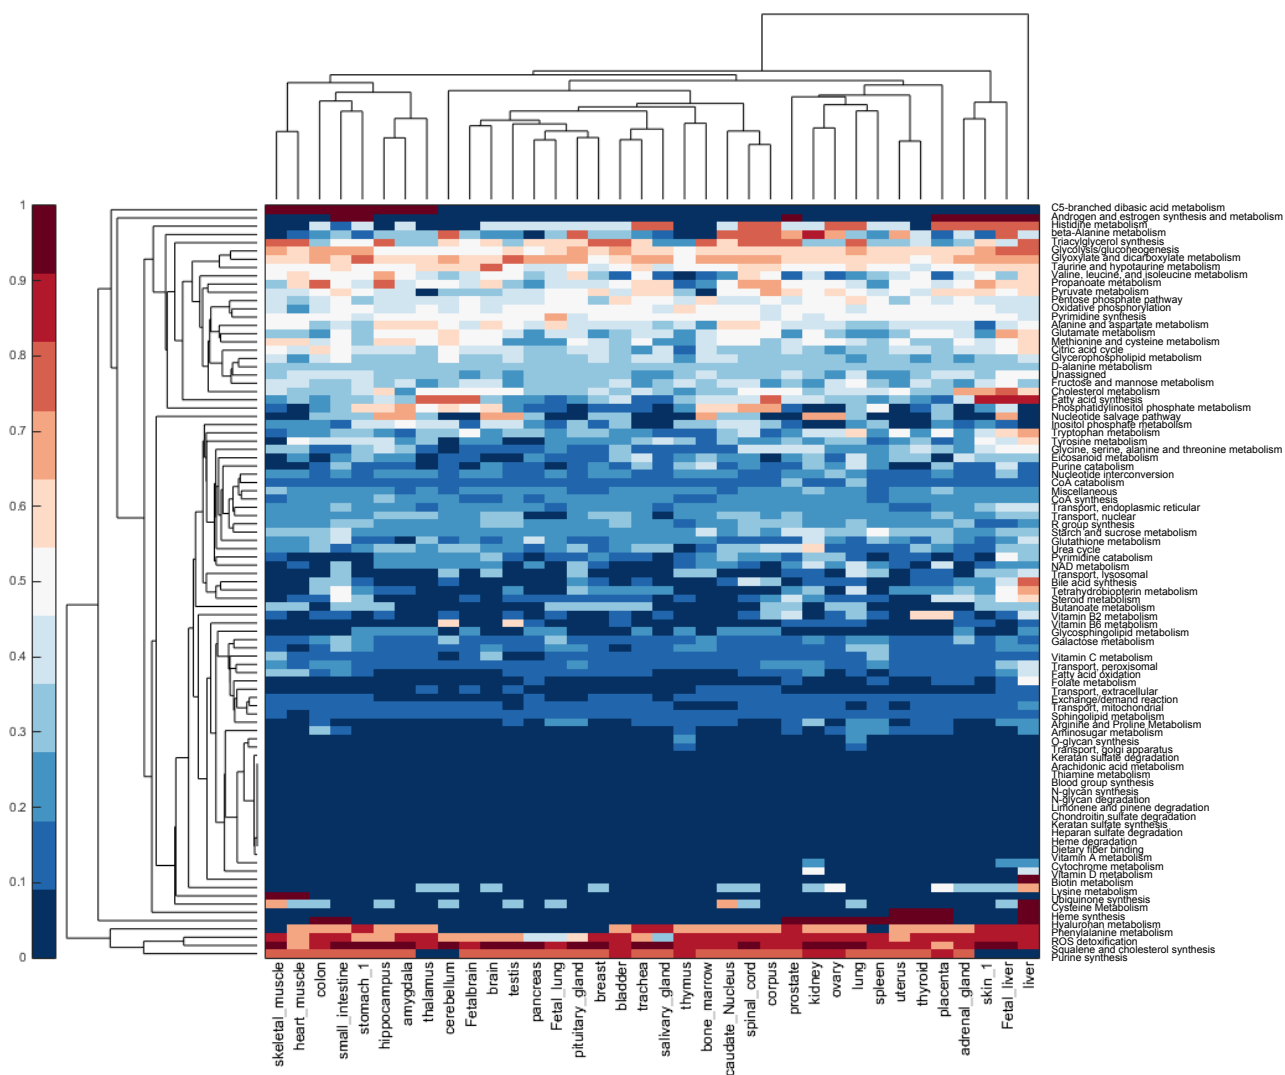

FASTCORMICS no medium constraint

Figure 6: Cluster plots of the tissue models built by the different tested algorithms: The fraction of active reactions in each pathway as defined by Recon2 was computed for each tissue model. The models were then cluster in function of the Euclidean distance.

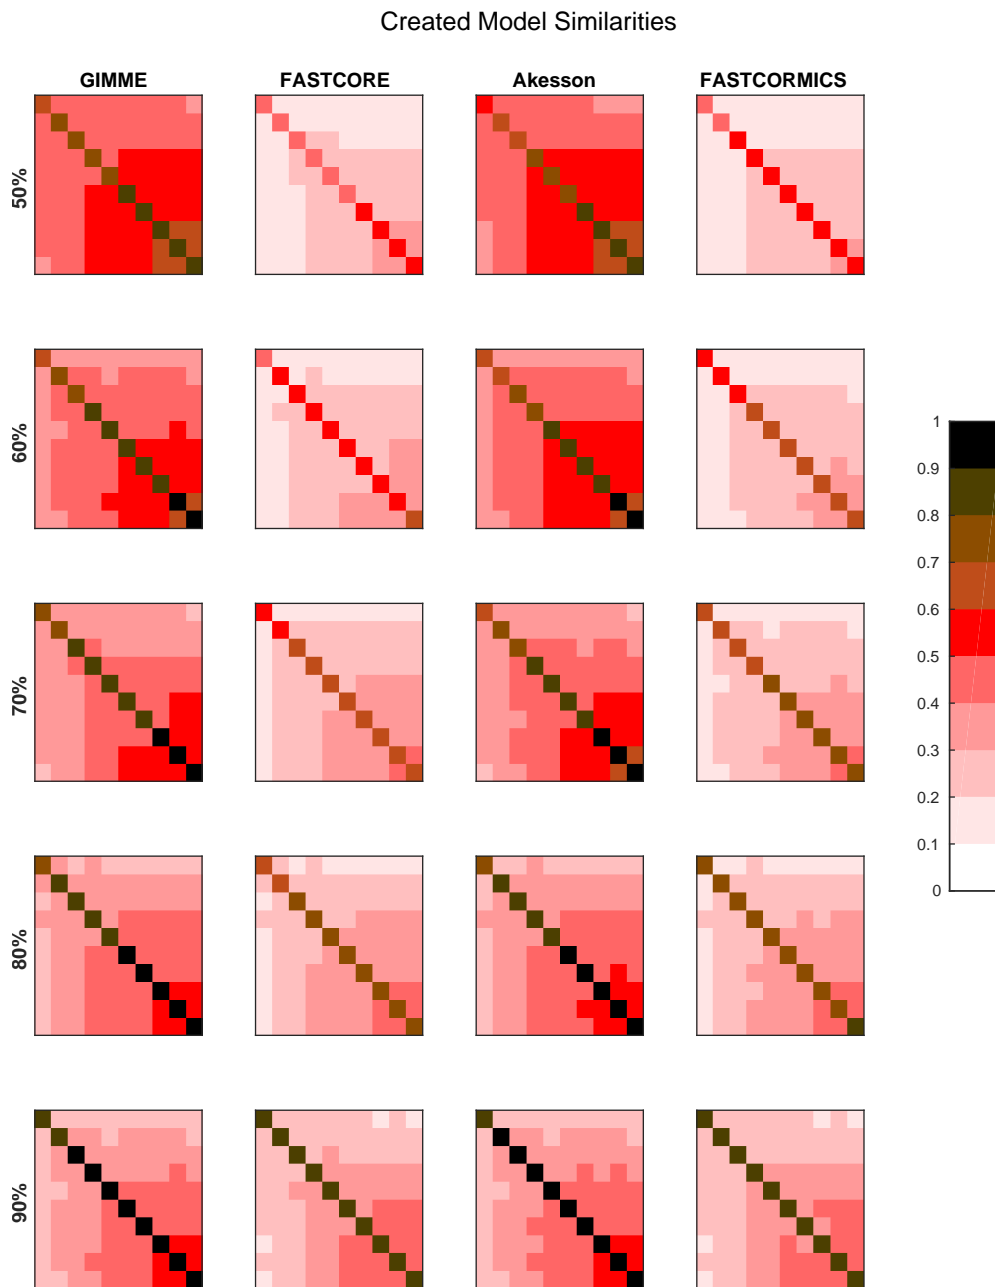

**Figure 7.** Resolution power: The plot shows the mean Jaccard distance between the networks generated by the different algorithms along with the distances of the original models. Each square represents the comparison between all reconstructions of one model and all reconstructions of another model, with the diagonal representing the comparison of all reconstructed model of the same model. The diagonal can therefore be an indicator for robustness (the brighter, the more similar the models) while the off diagonal indicates similarities between the generated models and is therefore an indicator for specificity to the input (the darker, the more distinct the generated models). When 90% of the data is available, all the algorithms are able to distinguish variations between the different models. But with a less complete data set, inclusive algorithms (here GIMME and Akesson) lose in specificity. It would also be expected that when only 50% of the data is available, the robustness decreases. But GIMME and Akesson only show a modest decrease of robustness.

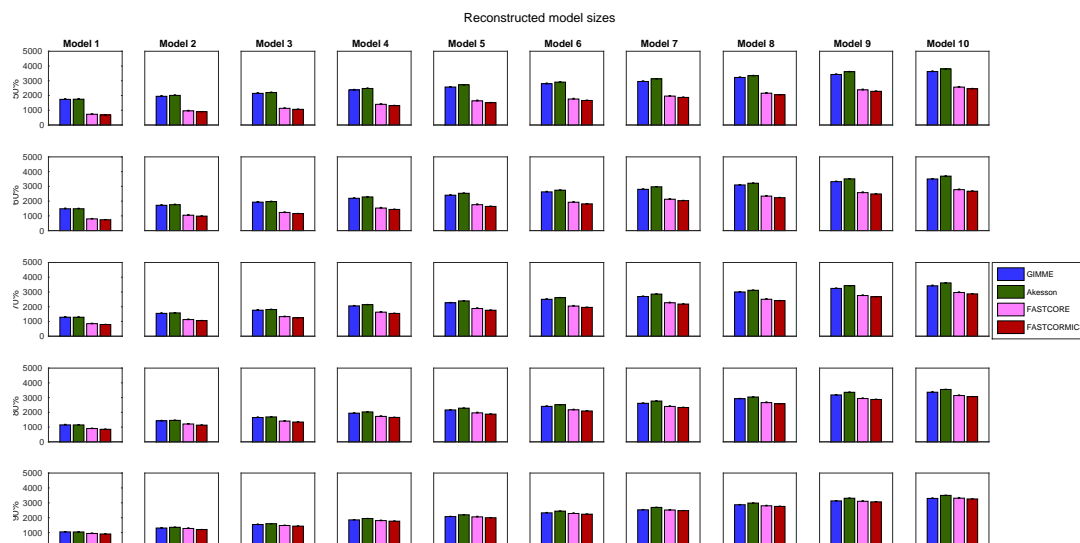

**Figure 8.** Model Sizes of the reconstructed Models. The target models had the following sizes: Model 1: 961, Model 2: 1276, Model 3: 1528, Model 4: 1876, Model 5: 2123, Model 6: 2377, Model 7: 2629, Model 8: 2935, Model 9: 3264, Model 10: 3455. The plots show that for a more complete input set, all algorithms tend to approach the real model size.

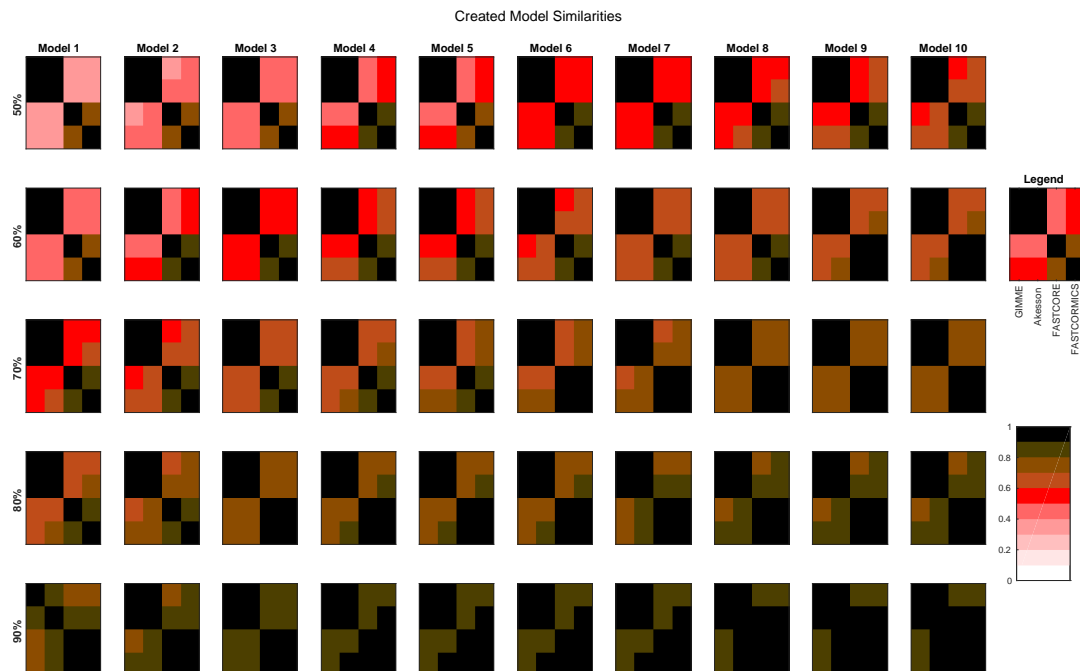

**Figure 9.** The plots show the mean Jaccard distance between the networks generated by the different algorithms for several artificial models and input percentages. For each algorithm, the corresponding networks (using the same input data) are compared. Smaller models (e.g. Model 1) tend to yield more distinguishable results, while larger models (due to a larger fraction of common reactions), tend to yield more similar networks. Overall, the difference between inclusive (GIMME/Akesson) and exclusive (Fastcore/FASTCORMICS) algorithms is clearly visible.



## 2 MODIFICATIONS FOR RECON TO ALLOW THE RECONSTRUCTION OF HEPATONET

- A reaction to create tag\_hs from 3 stearyl-CoAs was introduced to allow synthesis of biomass without an uptake of unidentified fatty acids.
- HepatoNet metabolites were matched to Recon Metabolites
- 2 reactions converting NH<sub>3</sub> into NH<sub>4</sub> were removed.
- 2 reactions converting Carbonate into HCO<sub>3</sub>.
- Recon reactions were matched to HepatoNet Reactions
- Reversibilities of HepatoNet were used for all Recon reactions that were mapped.
- Uptake Exchange reactions were adjusted to a maximal uptake of 1 (since there are several reactions which can take up Proteins and those would lead to a biomass above the upper bound.
- Gene AI971036 was converted to 3417 (according to GeneCards)
- In addition, the following reversibilities were adjusted:
  - GTHRDt was made irreversible (active transport of glutathione into the mitochondrion can otherwise generate ATP in Recon2).
  - C16txc was made irreversible , as it led to the production of free ATP in Recon2
  - GTHPm was made irreversible as it allowed the free generation of reductants in Recon2.
  - BILDGLCURte was made irreversible , as it led to the production of free ATP in Recon2
- The GPRs used in Recon2 version 4 were used as those are more consistent.

Our HepatoNet was then constructed by extracting all reactions which are in HepatoNet from the modified Recon network and adding all Importers and Exporters from Recon.

| Reaction | Formula using Recon ids                                                          | Flux |
|----------|----------------------------------------------------------------------------------|------|
| r0083    | $HC01434[m] \rightleftharpoons co2[m] + akc[m]$                                  | 1    |
| r0400    | $nad[c] + o2[c] + acnam[c] \rightleftharpoons h2o[c] + nadh[c] + HC01115[c]$     | 0.5  |
| r0425    | $nad[m] + icit[m] \rightleftharpoons nadh[m] + HC01434[m]$                       | 1    |
| r0617    | $nadp[c] + 4hproLT[c] \rightleftharpoons nadph[c] + 1p3h5c[c]$                   | 0.5  |
| r0668    | $ctp[c] + HC01115[c] \rightleftharpoons ppi[c] + HC01162[c]$                     | 0.5  |
| r1459    | $ppi[c] \rightleftharpoons ppi[n]$                                               | 0.5  |
| r1461    | $cmpacna[c] \rightleftharpoons cmpacna[n]$                                       | 0.5  |
| r0082    | $HC01434[c] \rightleftharpoons co2[c] + akc[c]$                                  | -1   |
| r0268    | $nadph[c] + o2[c] + cmpacna[c] \rightleftharpoons h2o[c] + nadp[c] + HC01162[c]$ | -0.5 |
| r0269    | $ctp[n] + acnam[n] \rightleftharpoons ppi[n] + cmpacna[n]$                       | -0.5 |
| r0422    | $nadp[c] + icit[c] \rightleftharpoons nadph[c] + HC01434[c]$                     | -1   |
| r0615    | $nad[c] + 4hproLT[c] \rightleftharpoons nadh[c] + 1p3h5c[c]$                     | -0.5 |
| r0868    | $co2[c] \rightleftharpoons co2[m]$                                               | -1   |
| r1147    | $akc[c] + icit[m] \rightleftharpoons akc[m] + icit[c]$                           | -1   |
| r1460    | $ctp[c] \rightleftharpoons ctp[n]$                                               | -0.5 |
| r1462    | $acnam[c] \rightleftharpoons acnam[n]$                                           | -0.5 |

**Table 2.** Overview of methods used for validation of automated tissue specific reconstruction algorithms.

### 3 EXAMPLE OF FREE NADPH PRODUCTION IN HEPATONET

An example solution can be found in Table 2

The Flux distribution can be split into the following reactions:

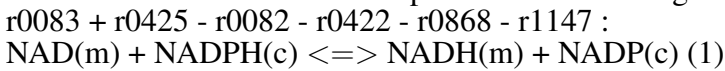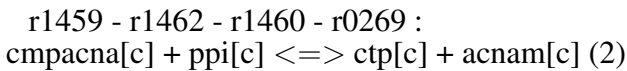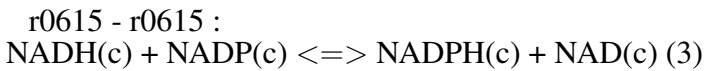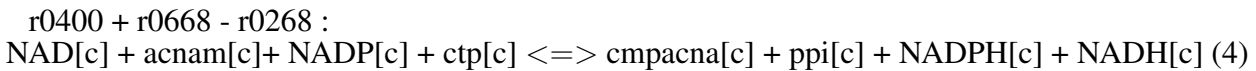

With (4) + (2) clearly producing free reductant.
